# Supplementary material
Source: Springer Nature journal article supplement (https://www.springermedizin.de/resource/supplementary/12986_2010_260_MOESM6_ESM.pdf/25655700)

### A. Chow

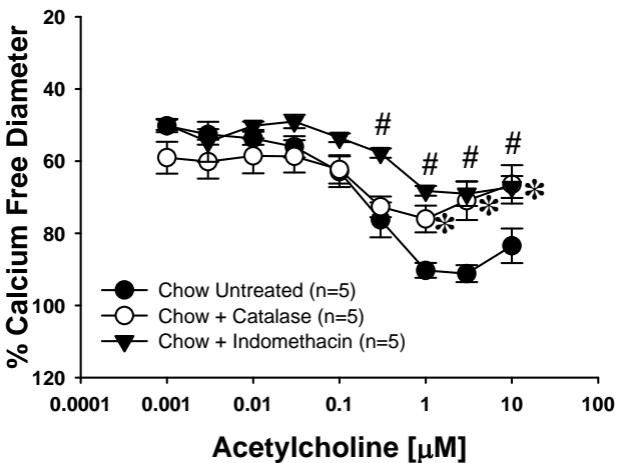

### B. HSD

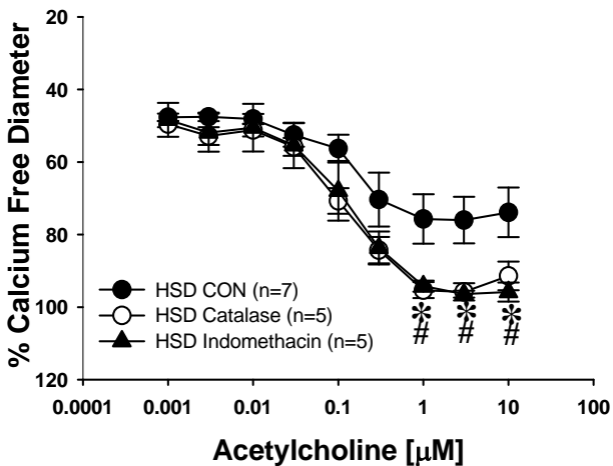

### C. HFD

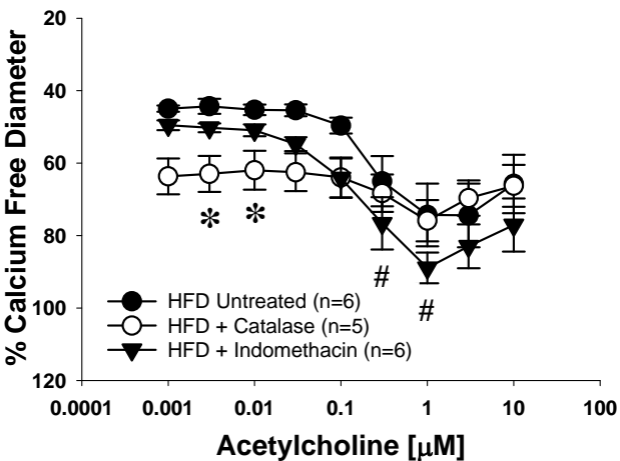

Supplement: MOESM6 [file 25655700]
